# Supplementary material for: The First Evidence on the Occurrence of Bisphenol Analogues in the Aqueous Humor of Patients Undergoing Cataract Surgery
Source: MDPI journal article supplement (doi:10.3390/jcm11216402), 2022-10-29
Supplement: s1 [file s1]

| Patient number | Mean concentration [ng mL <sup>-1</sup> ]; n=3 |       |          |       | Age | Gender | coexisting disease |                           |
|----------------|------------------------------------------------|-------|----------|-------|-----|--------|--------------------|---------------------------|
|                | BPA-1                                          | BPA-2 | BPA-free | ΣBPs  |     |        | ocular pathology   | other pathology: diabetes |
| KB 31          | 0.5                                            | 0.53  | <LOD     | 1.03  | 91  | w      | -                  | -                         |
| MZ 41          | 3.48                                           | 2.96  | <LOD     | 6.44  | 81  | w      | -                  | -                         |
| SZW 4706       | <LOD                                           | <LOD  | <LOD     | 0     | 75  | m      | AMD                | +                         |
| KAJ 5609       | <LOD                                           | <LOD  | <LOD     | 0     | 66  | w      | -                  | -                         |
| DW 44          | 1.2                                            | 1.66  | <LOD     | 2.86  | 78  | m      | AMD                | -                         |
| RB 53          | 1.18                                           | 2.19  | <LOD     | 3.37  | 69  | w      | -                  | -                         |
| PIH 3703       | <LOD                                           | <LOD  | <LOD     | 0     | 85  | w      | glaucoma           | -                         |
| KRM 4601       | <LOD                                           | <LOD  | <LOD     | 0     | 76  | w      | -                  | -                         |
| DA 64          | 1.04                                           | 1.13  | 0.35     | 2.52  | 68  | w      | AMD                | -                         |
| GJ 35          | 2.28                                           | 2.45  | <LOD     | 4.73  | 87  | w      | -                  | -                         |
| FW 69          | 1.86                                           | 2.58  | <LOD     | 4.44  | 53  | m      | -                  | -                         |
| KOB 3001       | <LOD                                           | <LOD  | <LOD     | 0     | 92  | w      | glaucoma           | -                         |
| ZJ 45          | <LOD                                           | <LOD  | <LOD     | 0     | 77  | m      | -                  | -                         |
| WE 54          | <LOD                                           | <LOD  | <LOD     | 0     | 68  | w      | glaucoma           | -                         |
| SZW 4003       | <LOD                                           | <LOD  | <LOD     | 0     | 82  | w      | -                  | -                         |
| TZ 51          | 2.65                                           | 3.82  | 1.57     | 8.04  | 71  | m      | AMD                | -                         |
| ST 40          | <LOD                                           | <LOD  | 0.5      | 0.5   | 82  | w      | -                  | -                         |
| KJ 36          | <LOD                                           | <LOD  | 0.6      | 0.6   | 86  | w      | -                  | -                         |
| WH 46          | <LOD                                           | <LOD  | 0.3      | 0.3   | 76  | m      | glaucoma           | -                         |
| SM 46          | <LOD                                           | <LOD  | 0.32     | 0.32  | 76  | w      | -                  | -                         |
| CJ 40          | <LOD                                           | <LOD  | 0.98     | 0.98  | 82  | w      | AMD                | -                         |
| KOK 3704       | <LOD                                           | <LOD  | <LOD     | <LOD  | 85  | w      | AMD                | -                         |
| IWS 4610       | <LOD                                           | <LOD  | <LOD     | <LOD  | 76  | w      | AMD                | -                         |
| ZAP 5110       | <LOD                                           | <LOD  | <LOD     | <LOD  | 71  | m      | -                  | +                         |
| KS 59          | 1.85                                           | 2.78  | 1.69     | 6.32  | 63  | m      | -                  | -                         |
| IWS 46 10      | 2.61                                           | <LOD  | <LOD     | 2.61  | 76  | w      | -                  | -                         |
| PIJ 3207       | <LOD                                           | 1.9   | <LOD     | 1.9   | 90  | m      | -                  | -                         |
| KUM7312        | 0.84                                           | <LOD  | <LOD     | 0.84  | 49  | w      | AMD                | -                         |
| KUS 5107       | 3.8                                            | 3.2   | <LOD     | 7     | 71  | m      | -                  | -                         |
| KRW4501        | <LOD                                           | <LOD  | 8.65     | 8.65  | 77  | m      | -                  | -                         |
| STT 5201       | <LOD                                           | 0.9   | <LOD     | 0.9   | 70  | m      | AMD                | -                         |
| LAZ 5304       | <LOD                                           | <LOD  | 0.3      | 0.3   | 69  | w      | -                  | -                         |
| POH 4508       | <LOD                                           | <LOD  | <LOD     | 0     | 77  | w      | -                  | -                         |
| BIS 4505       | <LOD                                           | <LOD  | 1.2      | 1.2   | 77  | m      | -                  | -                         |
| KAA 4507       | 7.51                                           | 6.87  | <LOD     | 14.38 | 77  | w      | -                  | -                         |
| DAJ 5710       | 1.54                                           | 1.23  | <LOD     | 2.77  | 65  | m      | -                  | -                         |
| RA 46          | 0.42                                           | 0.54  | <LOD     | 0.96  | 76  | w      | -                  | +                         |
| MS 48          | 3.76                                           | 3.91  | <LOD     | 7.67  | 74  | m      | -                  | +                         |

|          |      |      |      |      |    |   |          |   |
|----------|------|------|------|------|----|---|----------|---|
| CM 44    | 1.12 | 1.39 | <LOD | 2.51 | 78 | m | -        | + |
| DAU 4701 | 1.12 | 0.4  | 0.51 | 2.03 | 75 | w | -        | + |
| BUB 3605 | <LOD | <LOD | <LOD | 0    | 86 | w | -        | + |
| DUS 3603 | <LOD | <LOD | <LOD | 0    | 86 | m | glaucoma | - |
| ŚWA 3706 | <LOD | <LOD | <LOD | 0    | 85 | w | AMD      | - |
| ZDH 4701 | <LOD | <LOD | <LOD | 0    | 75 | m | -        | - |

**Table S1** The raw data for the male (m)/female (w) cataract individuals with and/or without coexisting ophthalmic pathology (AMD, glaucoma) presented by mean concentration [ng mL<sup>-1</sup>] of BPA-1, BPA-2, BPA-free, and ΣBPS. The measurements of BPs concentration were performed by UHPLC-MS/MS. Conditions of measurements were described in section 2.4.
